# Supplementary figures and images for: Long Noncoding RNA KIAA0125 Potentiates Cell Migration and Invasion in Gallbladder Cancer
Source: Hindawi journal article supplement (doi:10.1155/2015/108458), 2015-01-01

**A**

Lv-shCon

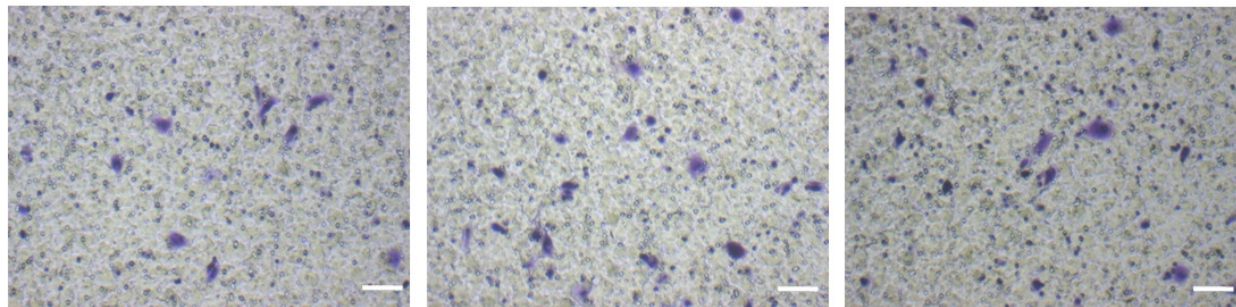

Lv-shKIAA0125

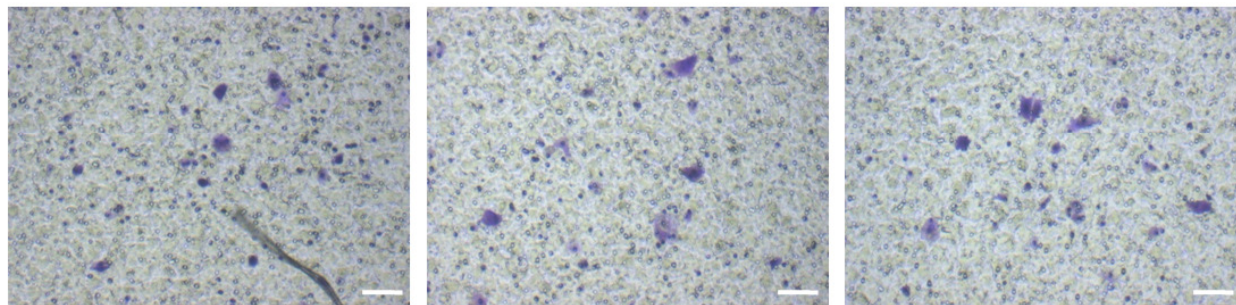**B**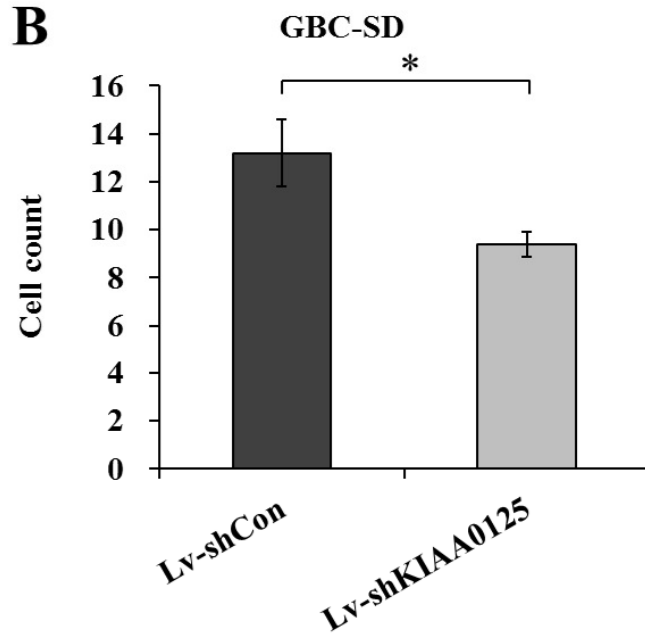**C**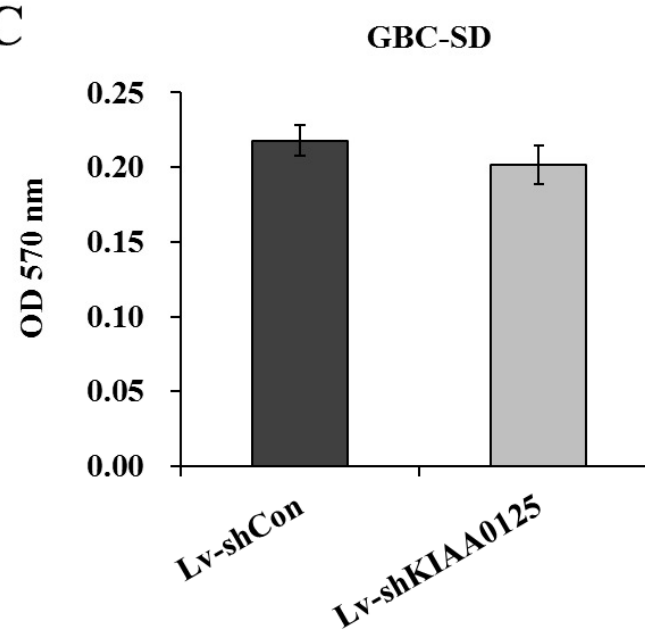

Supplement: f1 [file 108458.f1.pdf]
